# Supplementary material for: Low gonorrhoea antimicrobial resistance and culture positivity rates in general practice: a pilot study
Source: PubMed Central journal article supplement — Sex Transm Infect. 2019 Apr 30;96(3):220–2. doi: 10.1136/sextrans-2019-054006 (PMC7231444; doi:10.1136/sextrans-2019-054006), 2019-04-30
Supplement: sextrans-2019-054006supp001.pdf [file sextrans-2019-054006supp001.pdf]

Supplementary Table 1: Culture positivity rates and univariate logistic regression results by sample characteristics (n=484)

|                                | n cultures<br>positive/total n<br>cultures | % cultures<br>positive | Univariate logistic regression |             |       |
|--------------------------------|--------------------------------------------|------------------------|--------------------------------|-------------|-------|
|                                |                                            |                        | OR                             | 95% CI      | P     |
| <b>Total</b>                   | 80/484                                     | 16.5                   |                                |             |       |
| <b>Laboratory</b>              |                                            |                        |                                |             |       |
| Star-SHL                       | 60/331                                     | 18.1                   | ref.                           |             | -     |
| Certe                          | 14/80                                      | 17.5                   | 0.96                           | (0.50-1.82) | 0.896 |
| Izore                          | 6/73                                       | 8.2                    | 0.40                           | (0.17-0.98) | 0.044 |
| <b>Sex</b>                     |                                            |                        |                                |             |       |
| Female                         | 41/264                                     | 15.5                   | ref.                           |             | -     |
| Male                           | 39/220                                     | 17.7                   | 1.17                           | (0.72-1.89) | 0.517 |
| <b>Age</b>                     |                                            |                        |                                |             |       |
| <25                            | 39/199                                     | 19.6                   | ref.                           |             | -     |
| 25-34                          | 24/179                                     | 13.4                   | 0.64                           | (0.36-1.11) | 0.109 |
| >=35                           | 17/106                                     | 16.0                   | 0.78                           | (0.42-1.47) | 0.445 |
| <b>Anatomical<br/>location</b> |                                            |                        |                                |             |       |
| Vaginal/Cervical               | 37/229                                     | 16.2                   | ref.                           |             | -     |
| Urethral                       | 13/65                                      | 20.0                   | 1.30                           | (0.64-2.62) | 0.468 |
| Anal                           | 1/42                                       | 2.4                    | 0.13                           | (0.02-0.95) | 0.044 |
| Oral                           | 0/29                                       | 0.0                    | -                              |             | -     |
| Urine                          | 26/101                                     | 25.7                   | 1.80                           | (1.02-3.18) | 0.043 |
| Unknown                        | 3/18                                       | 16.7                   | 1.04                           | (0.29-3.76) | 0.955 |
